# Supplementary material for: Zeaxanthin promotes mitochondrial biogenesis and adipocyte browning via AMPKα1 activation
Source: Royal Society of Chemistry journal article supplement (doi:10.1039/c8fo02527d), 2019-01-01
Supplement: c8fo02527d1.pdf [file c8fo02527d1.pdf]

## Supplements

**Table S1. Primers sequences used in qRT-PCR analysis.**

| Gene name | Forward primer (5'–3') | Reverse primer (5'–3')  |
|-----------|------------------------|-------------------------|
| Ucp1      | CCTGCCTCTCTCGGAAACAA   | GTAGCGGGGTTTGATCCCAT    |
| Sirt1     | TTCCAGCCATCTCTGTGTCA   | GATCCTTTGGATTCTCTGCAA   |
| Ppargc1a  | CCGAGAATTCATGGAGCAAT   | GTGTGAGGAGGGTCATCGTT    |
| Lkb1      | CGAGGGATGTTGGAGTATGAG  | CTTAGTGTCTGGGCTTGGTG    |
| Fgf21     | CTGGGGGTCTACCAAGCATA   | CACCCAGGATTTGAATGACC    |
| Prdm16    | GATGGGAGATGCTGACGGAT   | TGATCTGACACATGGCGAGG    |
| Ppara     | TACTGCCGTTTTTACAAGTGC  | AGGTCGTGTTTACAGGTAAGA   |
| Cidea     | CGGGAATAGCCAGAGTCACC   | TGTGCATCGGATGTCGTAGG    |
| Foxo1     | CTACGCGTGGATGGTGAAGAG  | TGTGAAGGGACAGATTGTGG    |
| Camkk2    | CCATCGAGCAAGTGTACCAG   | ACTTCCATTACAGGCCCTTG    |
| Foxo3     | CGTTGTTGGTTTGAATGTGGG  | GGTTTTCTCTGTAGGTCTTCCG  |
| Ulk1      | CTAAGCTGCCTGACTTCTTAC  | CCAACAGGGTCAGCAAATTC    |
| Cd137     | GGTCTGTGCTTAAGACCGGG   | TCTTAATAGCTGGTCCTCCCTC  |
| Tbx1      | AGCGAGGCGGAAGGGA       | CCTGGTGACTGTGCTGAAGT    |
| Tmem26    | GAAACCAGTATTGCAGCACCC  | CCAGACCGGTTTACATACCA    |
| Cited1    | GGGGTAAAAGATCGCAAGGC   | TGGTAGAAGGGGTGGCAGTA    |
| Shox2     | CCTGCCCCATTGATGTGTTA   | ACGCCGTAAGTTCTTCCATC    |
| Zic1      | GCCACAAATCCGGGAAGAAG   | CTCACTTTCTCGCCGCTCAG    |
| Lhx8      | CATCGCTGTTCTGCCTGTTAG  | CTCGGGATTTCAGCAGTCCTTC  |
| Eva1      | AGTGCTGATAAAGCCGAGGG   | AGCTTCTCGAAGTGTTAGTCTGT |
| Pdk4      | AGTGACTCAAAGACGGGAAAC  | GTGTGAGGTTTAATTCTGGCG   |
| Cytb      | ACCTCCTATCAGCCATCCCA   | AGCGAAGAATCGGGTCAAGG    |
| Rplp0     | TGACATCGTCTTTAAACCCCG  | TGTCTGCTCCCACAATGAAG    |
| Nrf1      | CGAAAGAGACAGCAGACACG   | TTGAAGACAGGGTTGGGTT     |
| Nrf2      | AGAACAAGTGACAAGATGGGC  | TCGGTCATGCTGAATTCCTTC   |

---

|                |                          |                          |
|----------------|--------------------------|--------------------------|
| Nampt          | GAATGTCTCCTTCGGTTCTGG    | TCAGCAACTGGGTCCTTAAAC    |
| Tfam           | CACCCAGATGCAAACTTTCAG    | CTGCTCTTTATACTTGCTCACAG  |
| Cd36           | GCAACAAACCACACACTGGG     | AGTCCTACACTGCAGTCCTCA    |
| Fas            | TGCTGTTGGAAGTCAGCTATGAA  | GATGCCTCTGAACCACTCACAC   |
| Fabp4          | TGGGAACCTGGAAGCTTGTCTC   | GAATCCACGCCCAGTTTGA      |
| Prkaa1         | CCCTTCAGTAATCAGCCTTTTG   | GGTTGAACTATAAGATGGGTCCTC |
| Prkaa2         | CATCCAGACTATCTCAACCG     | GGGTCTTCAGGAAATAGGTAGC   |
| $\beta$ -actin | CATCCGTAAAGACCTCTATGCCAA | ATGGAGCCACCGATCCACA      |

C

---

**Fig S1**

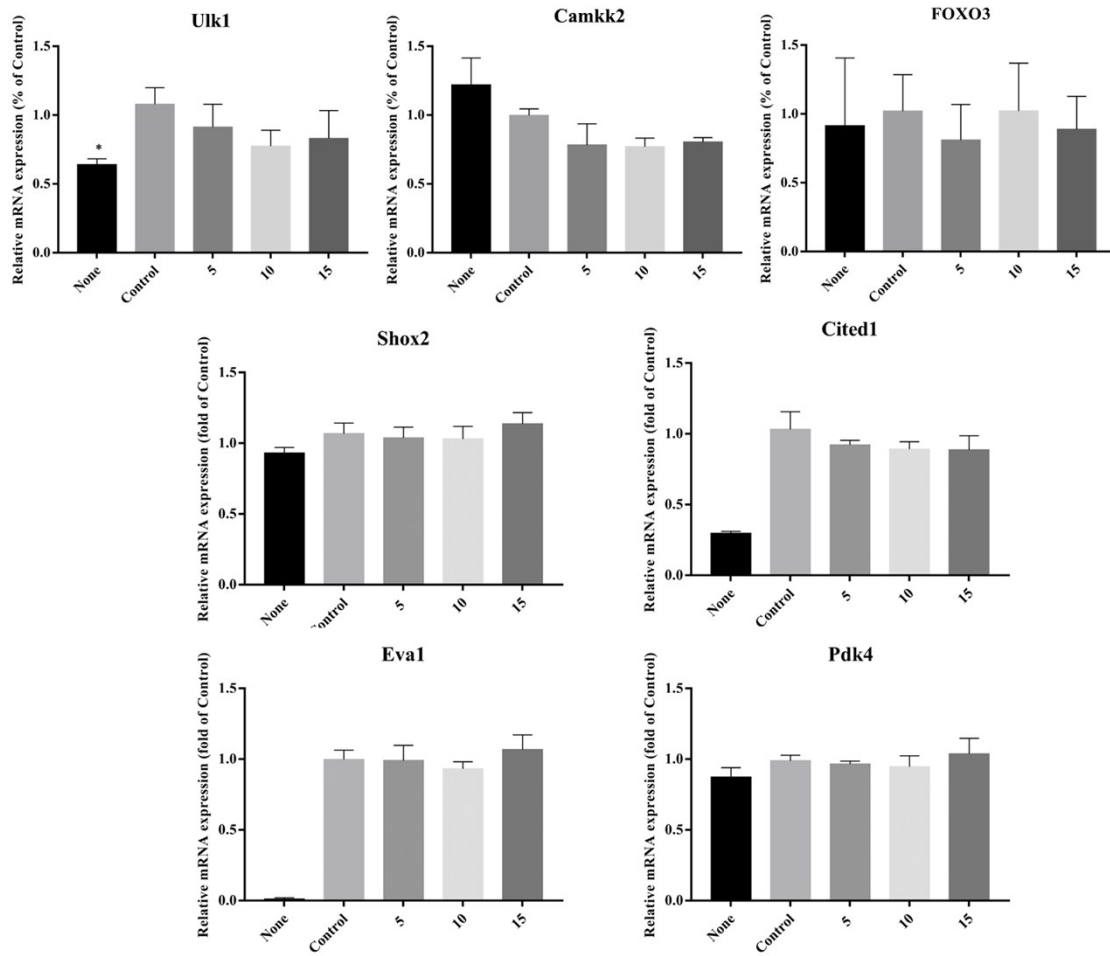

**Fig S2**

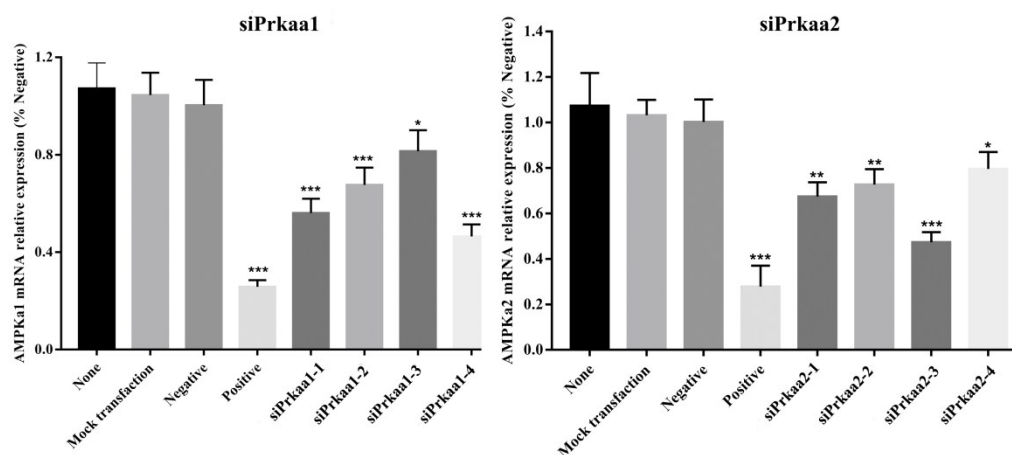

Selection of optimal target sequences for *AMPKα1* and *AMPKα2* gene. *AMPKα1* (*Prkaa1*, gene ID: 105787) and *AMPKα2* (*Prkaa2*, gene ID: 108079). None: Normal cultural cells without transfection. Mock transfection: Lipofectamine 3000 as a transfer control. Negative: universal negative control provided by company. Positive: *GAPDH* as positive control. Analysis was performed using the  $2^{-\Delta\Delta Ct}$  method and normalized using *GAPDH* gene. The siAMPKα1-4 and

siAMPK $\alpha$ 2-3 were selected for the further experiments.
